# Supplementary material for: Intra-arterial catheter-directed CT angiography for assessment of endovascular aortic aneurysm repair
Source: PLoS One. 2019 Sep 10;14(9):e0221375. doi: 10.1371/journal.pone.0221375 (PMC6736289; doi:10.1371/journal.pone.0221375)
Supplement: S1 File — (XLSX) [file pone.0221375.s001.xlsx]

## Sheet: Tabelle1
		Clinical data (0=no, 1= yes)										catheter exam							Image quality
Age	Sex	Grade RI	a. Hypert.	Smoking	Diabetes	Hyperlip.	CKD	Dialysis	Carotid_Plaque	Heart insufficiency	CAD surgery	Catheter	CT-scan	contrast media in ml CTA	Nephorotox Med.	local complications	Stroke	Revision of puncture site	ROI Aorta (Mean)	ROI Aorta (SD)	ROI Aorta (Min)	ROI Aorta (Max)	ROI Muskel (Mean)	ROI Muskel (SD)	Likert-Skala	ROI Aorta (Mean)	ROI Aorta (SD)	ROI Aorta (Min)	ROI Aorta (Max)	ROI Muskel (Mean)	ROI Muskel (SD)	Likert-scale R 1	Likert-scale R 2
85	1	1	0	0	0	1	0	0	0	0	0	0	1	120	0	0	0	0	440	26	366	493	47	22	5	431.3	27	372	503	49.5	21.8	5	5
84	1	3	1	1	0	1	1	0	0	0	0	0	1	110	1	0	0	0	463.1	15.2	430	509	38.6	15.8	5	458.5	28.2	396	525	41.4	23.4	5	4
81	0	4	1	1	1	1	1	0	0	1	0	0	1	100	1	0	0	0	230	8.3	211	250	37.2	8.3	4	230.6	7.8	210	251	42.4	9.7	5	4
51	1	1	1	0	0	0	0	0	0	0	0	0	3	150	1	0	0	0	130	20.6	84	189	53.1	18.3	3	275.8	37.8	165	385	48.8	27	5	4
70	1	1	1	1	0	1	0	0	0	0	0	0	4	120	1	0	0	0	111.7	67.7	-43	314	32.8	63	3	109.3	21.4	44	179	32.1	24.2	3	3
73	1	4	1	1	0	1	1	0	0	1	1	0	4	120	1	0	0	0	312.9	24.8	236	367	24.1	22.1	3	312.5	28.8	212	372	17.6	22.8	4	4
64	1	2	1	1	0	1	1	0	0	1	1	0	4	150	1	0	0	0	329.9	28.7	254	398	50.8	23	4	340.1	13.5	298	374	44.8	13.5	5	4
85	1	4	1	0	0	1	1	0	0	0	0	0	4	120	1	0	0	0	370.5	22.9	317	432	32.8	25.5	4	388.3	27.1	322	464	49.2	30.5	5	5
71	1	0	0	0	0	1	0	0	0	1	1	0	4	110	0	0	0	0	189	29	107	262	50.5	18.6	5	190.1	26.7	109	274	51.3	17.9	5	5
76	1	0	1	1	0	0	0	0	0	1	1	0	4	140	1	0	0	0	293.3	35.8	205	383	43.7	33	4	297.8	35.7	213	290	29.8	28.2	4	4
86	1	0	1	1	0	1	0	0	0	0	0	0	4	130	1	0	0	0	351.2	32.7	258	455	36.6	28.4	4	350.7	31.4	243	428	38.9	25.4	4	4
73	1	0	1	0	0	1	0	0	0	1	1	0	4	130	1	0	0	0	-	-	-	-	-	-	-	-	-	-	-	-	-		-
73	1	0	0	0	0	0	0	0	0	1	1	0	4	150	1	0	0	0	-	-	-	-	-	-	-	-	-	-	-	-	-		-
72	1	0	1	0	0	0	0	0	0	1	1	0	4	120	1	0	0	0	-	-	-	-	-	-	-	-	-	-	-	-	-		-
59	1	0	1	0	0	1	0	0	0	0	0	0	4	110	1	0	0	0	-	-	-	-	-	-	-	-	-	-	-	-	-		-
66	1	3	1	1	0	1	1	0	0	0	1	0	4	110	1	0	0	0	361	53.2	248	916	48.7	24.6	3	358.5	31	26.9	442	49.3	25.6	5	4
77	1	0	0	0	0	0	0	0	0	0	0	0	4	140	0	0	0	0	310	20.2	250	365	38.6	21.9	5	309	23.2	24.7	360	47.6	18.9	5	4
65	1	0	1	1	0	1	0	0	0	0	0	0	4	120	1	0	0	0	257.8	28.1	186	327	59.3	25	5	255.6	30.5	165	330	53.9	22.2	3	3
67	1	0	0	1	0	1	0	0	1	0	0	0	4	110	0	0	0	0	338.5	25.6	258	406	51.9	26	5	339.5	26.6	271	402	50.4	26.8	4	4
86	1	0	0	0	0	0	0	0	0	0	0	0	4	100	0	0	0	0	426.2	35.6	312	521	35.9	34.9	4	416.1	37.6	303	517	43.5	27.4	3	3
75	1	0	1	1	1	1	0	0	0	0	0	0	4	120	1	0	0	0	-	-	-	-	-	-	-	-	-	-	-	-	-	4	4
78	1	0	1	0	0	0	0	0	0	1	1	0	4	110	1	0	0	0	-	-	-	-	-	-	-	-	-	-	-	-	-	5	5
71	1	0	0	1	0	0	0	0	0	0	0	0	4	130	1	0	0	0	366.5	24.1	312	425	56.4	21.8	4	364.2	26.5	286	426	54.4	21.7	5	4
77	1	3	1	1	0	1	1	0	0	0	0	0	4	130	1	0	0	0	329	25.4	249	385	33.2	25.9	3	324.1	29.9	222	404	35.5	25.5	4	4
76	1	0	1	1	0	0	0	0	1	1	1	0	4	120	1	0	0	0	-	-	-	-	-	-	-	-	-	-	-	-	-		-
67	1	1	1	1	0	1	0	0	0	0	0	0	4	100	1	0	0	0	253	27.2	178	320	63.9	23	4	257	24.6	195	324	53.2	22.9	3	3
73	1	0	1	1	0	1	0	0	0	1	1	0	4	100	1	0	0	0	127.6	34.7	32	222	41.4	25.4	3	127	35	32	215	43.6	26.5	3	3
68	1	2	1	1	0	1	1	0	0	0	0	0	4	100	1	0	0	0	-	-	-	-	-	-	-	-	-	-	-	-	-		-
80	1	1	1	0	0	1	1	0	0	0	0	0	4	100	1	0	0	0	363.2	34.1	283	482	51.9	25.4	4	356.1	35.4	258	459	55.9	32.4	4	3
68	1	1	1	1	1	1	0	0	0	1	1	0	4	130	1	0	0	0	-	-	-	-	-	-	-	-	-	-	-	-	-	3	3
60	1	2	0	1	0	0	1	0	0	0	0	0	4	150	1	0	0	0	351.6	22.9	282	402	45.5	23.2	5	350.9	22.2	299	417	49.3	19.4	5	4
76	0	0	1	0	0	0	0	0	0	0	0	0	4	130	1	0	0	0	-	-	-	-	-	-	-	-	-	-	-	-	-	4	4
86	1	1	1	0	0	1	0	0	0	1	1	0	4	130	1	0	0	0	464.5	27.2	401	540	37.1	18.8	4	465.1	26.6	401	551	34.8	20.4	4	4
79	1	1	1	0	0	1	0	0	0	1	1	0	4	110	1	0	0	0	452.2	33.3	362	328	32.6	23.6	4	451.9	28.2	380	541	42	23	4	3
72	1	1	1	1	0	1	0	0	0	1	1	0	4	110	1	0	0	0	422.1	22.6	361	473	21.6	31	4	406.3	29.5	311	510	32.7	29.8	5	4
71	1	1	1	1	0	1	1	0	1	0	0	0	4	110	1	0	0	0	332.3	28.5	232	400	44.2	22	4	329	19.2	283	379	48.3	19	5	4
64	1	1	1	1	0	1	1	0	1	0	0	0	4	100	1	0	0	0	268.2	37.9	172	371	61.1	26.5	4	266.8	34.9	179	369	60.7	30.8	4	3
70	1	3	1	1	0	1	1	0	0	1	1	0	4	100	1	0	0	0	-	-	-	-	-	-	-	-	-	-	-	-	-	4	4
85	1	2	1	0	0	0	0	0	0	0	0	0	4	110	1	0	0	0	419	40	273	516	38.3	23.8		429.7	30	347	525	35.4	28.5
71	1	0	1	0	0	0	0	0	0	0	0	0	4	110	1	0	0	0	331.6	25.3	259	397	20.8	32	5	335.5	25.7	275	395	21.5	32	5	4
72	1	2	1	1	0	0	0	0	0	0	0	1	4	20	1	0	0	0	321.2	89.9	162	565	16.5	36.8	3	238.9	55	148	394	19.8	35	3	3
62	1	0	1	0	0	0	0	0	0	0	0	0	4	120	1	0	0	0	303.9	20.8	259	371	58.2	19.9	5	308.9	25.2	239	370	61.7	20.5	5	4
85	1	1	0	1	0	0	0	0	0	0	0	0	4	120	0	0	0	0	281.8	32.1	196	37	81	36.1	4	296.8	33.7	181	430	10.6	32.3	5	4
84	1	3	1	0	0	0	1	0	0	1	1	0	4	135	0	0	0	0	218.9	27.7	158	309	75.2	27.5	4	93	28.4	17	170	35.8	24.9	2	2
76	1	3	0	0	0	0	1	0	0	0	0	0	4	130	0	0	0	0	214.6	29.1	-30	105	47.8	24.6	4	213.1	29.3	133	301	54.3	22	4	3
54	1	0	1	0	0	1	0	0	0	0	0	0	4	110	1	0	0	0	272.1	40	193	380	44.2	31.2	4	274.5	40.1	158	409	45.8	32.8	3	3
90	1	3	0	0	0	1	0	0	0	1	0	0	4	100	0	0	0	0	340.1	30.8	265	414	30.6	34.5	5	334.1	31.6	246	423	40.2	23.9	5	4
73	1	2	1	1	0	1	1	0	0	1	1	0	4	130	1	0	0	0	173.8	20	116	242	52	16.3	3	138.5	174.3	53	258	51.4	32.3	4	3
82	1	1	1	0	0	1	0	0	0	0	0	0	4	100	1	0	0	0	301.7	34.5	201	425	32.4	30.3	3	293.9	38	211	389	31.3	29.4	4	4
64	1	1	1	0	0	0	0	0	0	0	0	0	4	110	1	0	0	0	240.8	36.1	154	329	44	25.2	3	239.8	33	143	342	45.4	23.9	4	4
72	1	2	0	1	1	0	0	0	0	1	0	0	4	130	1	0	0	0	281.7	26.8	212	353	25.7	27.7	4	286.4	31.3	198	380	34.3	30.7	5	4
79	1	3	1	0	0	1	1	0	0	0	0	1	4	25	1	0	0	0	372.2	24.8	297	434	42.7	19.5	5	369.2	24	284	441	42.6	18.3	4	5
78	1	3	1	0	1	1	1	0	0	1	1	1	1	35	1	0	0	0	225.1	39.1	137	312	32.9	24.3	5	222.6	39.7	130	357	36.3	26.3	4	3
80	1	3	1	1	0	1	1	0	0	1	0	1	4	25	1	0	0	0	274.8	31.9	193	349	57.5	18.4	5	274.6	30.7	188	336	59.1	19.2	5	5
74	1	3	1	0	0	0	1	0	0	0	0	1	3	25	1	0	0	0	-	-	-	-	-	-	-	355.5	29.3	303	451	44.5	25.3	5	5
60	1	4	1	1	0	1	1	0	0	1	1	1	4	20	1	0	0	0	257.5	28.4	178	337	54.2	23.4	5	273.2	28.4	214	369	55	18.3	4	4
70	1	4	1	1	0	1	1	0	0	1	1	1	3	25	1	0	0	0	81.9	25.5	6	140	49.5	27.6	2	100.1	28.2	21	167	49.5	24	4	4
72	1	3	1	0	0	0	1	0	0	0	0	1	4	30	0	0	0	0	355.5	42.3	267	485	59.4	21.4	4	357.7	60	225	489	52.1	20.7	5	4
90	1	3	1	0	0	1	1	0	1	1	1	1	4	25	0	0	0	0	464.2	23.9	395	522	38.6	25.6	5	470.7	21.7	416	535	38.3	24.8	5	5
77	1	4	1	1	1	1	1	0	0	1	1	1	4	25	1	0	0	0	285.9	28.6	220	358	39.2	15.8	4	238.5	45.4	132	343	38.4	21.8	3	3
88	1	4	1	1	0	1	1	0	0	1	1	1	4	25	1	0	0	0	288.1	46.9	165	404	39.9	33.2	3	302.8	44.6	183	407	39.7	28.7	4	4
76	1	3	1	1	1	1	1	0	1	1	1	1	4	25	1	0	0	0	222.7	48.9	89	337	56.2	21.6	2	237.2	34.6	144	340	54.7	20.5	4	4
75	1	3	1	0	1	1	1	0	1	1	1	1	3	25	1	0	0	0	436.5	171.2	286	2309	19.1	32.6	4	404.3	37.8	276	537	21.7	31.2	5	4
75	1	3	1	1	0	1	1	0	0	1	1	1	4	25	1	0	0	0	417.9	60.2	299	572	48.8	22.8	3	417.5	57.8	272	538	52.1	18.9	5	4
71	1	4	1	0	0	1	1	0	0	0	0	0	3	130	1	0	0	0	293.7	19.3	233	337	49.7	17.2	4	295.6	16	253	337	49.9	14.4	5	5
80	1	3	1	0	0	0	1	0	0	0	0	1	3	15	1	0	0	0	83.4	15.9	39	136	52.3	17.7	1	300.1	41.5	155	413	54.9	19.5	4	4
66	1	4	1	0	0	0	1	0	0	1	1	1	3	45	1	0	0	0	266.6	22.9	203	322	37.5	28.5	5	268.6	23.2	211	431	43.3	23.5	5	4
77	1	4	1	0	0	0	1	0	0	0	0	1	3	25	1	0	0	0	427.9	19.8	377	485	33.9	19.9	4	435.6	18.7	390	496	36.1	20.6	5	4
76	1	3	1	1	0	0	1	0	0	0	0	1	3	40	1	0	0	0	187.4	66	66	372	44.5	32.8	4	103.3	33	24	190	62.2	22.9	3	3
75	1	3	0	0	0	0	1	0	0	0	0	1	3	25	0	0	0	0	155.5	17	98	211	49.9	17.5	4	214.2	27.1	111	299	56.7	20.7	4	4
80	1	3	1	0	0	0	1	0	1	0	0	1	4	15	1	0	0	0	210.7	32.2	123	297	37.2	18.5	4	165.5	37.7	73	281	43.8	20.5	5	4
47	1	4	1	0	0	0	1	0	0	1	0	1	3	20	1	0	1	0	220.5	44.4	136	328	61	35.7	3	196	21.1	154	255	51.7	19.5	3	4
75	1	4	1	1	1	1	1	0	0	1	1	1	4	25	0	0	0	0	-	-	-	-	-	-	-	-	-	-	-	-	-		-
88	1	1	1	0	0	1	1	0	0	1	1	1	4	25	1	0	0	0	624.3	43.6	543	747	50.2	18.1	3	573.2	92.4	383	756	60.7	24	4	4
62	1	4	1	1	1	1	1	0	1	1	1	1	4	20	1	0	0	0	332.2	43.3	248	493	52.2	18.2	4	316.2	43.5	209	418	53.1	19.6	4	4
72	1	2	1	1	1	1	1	0	0	1		1	4	20	1	0	0	0	-	-	-	-	-	-	-	295.7	53	164	437	16.2	42.6
63	1	4	1	1	0	1	1	0	1	1	1	1	3	15	1	0	0	0	228.6	36.1	83	300	33.4	25.1		275.1	44	149	406	36.3	21.7	4	3
86	1	2	1	1	0	1	9	9	9	9	1	1	3	15	1	0	0	0	101.8	23.3	43	164	29.2	21.4	3	100.4	23.1	36	169	26.7	22.4	4	4
79	1	4	1	0	0	0	1	0	0	1	9	1	4	20	0	0	0	0	440.5	48.2	319	561	46.1	38.4	4	470.6	58.5	302	648	54.1	35.4	4	4
71	1	4	1	0	0	0	1	0	0	1	0	1	4	20	0	0	0	0	474.9	60	342	639	49.9	33.9	4	470.2	56.6	306	608	50.6	36.7	4	4
47	1	2	1	0	0	1	1	0	0	0	0	1	3	20	0	0	0	0	313.6	38.1	218	398	49.8	26.8	5	322.3	26.7	250	396	48.4	31.5	4	4
79	0	2	1	1	1	1	1	0	0	0	0	1	3	15	0	0	0	0	244.8	43.5	139	362	45.5	33.7	3	240.9	41.8	138	339	32.1	37.2	4	4
69	1	3	1	1	0	1	1	0	0	1	1	1	3	25	0	0	0	0	727.1	57.6	601	902	45.5	34.1	3	740	75.6	573	970	53.3	41.9	4	4
77	0	3	1	0	0	1	1	0	0	0	0	1	3	25	0	0	0	0	279.3	35.6	206	382	24	38.7	5	250.2	29.2	169	303	31.3	28.5	4	3
78	1	3	1	0	1	1	1	0	0	1	1	1	4	20	0	0	0	0	214.7	42.8	97	341	31.5	33.2	5	229.5	55.3	92	361	36.8	30.3
73	1	3	0	0	0	1	1	0	0	1	1	0.	4.	120	1	0	0	0	438.7	43.2	280	47	31.8	12.1	5	137	24.9	56	197	31.6	20.8	4	4
82	0	3	1	0	0	1	0	0	0	0	0	0.	4.	120	1	0	0	0	424.3	28.3	317	500	42	25.9	5	422.5	28.9	354	503	43	23.4	5	5
86	1	3	1	1	1	1	1	0	0	11	1	0.	4	120	1	0	0	0	379	39.6	238	480	17.3	33.6	4	384.4	34.6	288	496	16.3	33.8	4	4
64	1	3	1	0	1	1	1	0	0	1	1	0.	4.	120	1	0	0	0	391.9	26.6	286	459	41.9	19.5	5	388	25.3	333	466	43.2	22.6	5	4
76	1	2	1	1	0	1	1	0	0	0	0	0.	4	120	1	0	0	0	409.6	29.5	343	504	44.4	26.1	5	406.2	26.3	351	481	30.8	30.6	5	4
72	1	2	0	1	1	0	1	0	0	1	0	0.	3	120	1	0	0	0	-	-	-	-	-	-	-		-	-	-	-	-		-
81	1	2	1	1	0	0	1	0	0	0	0	0.	4.	120	1	0	0	0	371.1	23.3	318	422	33.7	21.6	5	375.2	22.4	316	426	34.1	19.3	5	5
61	1	3	1	0	0	0	1	0	0	0	0	0.	4.	120	1	0	0	0	201.1	30.7	127	277	44.3	20.5	3	204.6	27.5	132	298	46.4	20.8	4	4
83	1	3	1	0	0	0	1	0	0	0	0	0.	4.	120	1	0	0	0	365.3	21.8	294	433	37.3	21.3	5	368.1	21.9	319	418	40.2	19	5	5
77	1	3	1	1	0	1	1	0	0	1	1	0.	4.	120	1	0	0	0	381.1	29.9	313	442	28.5	27.1	4	374.1	31.5	267	449	33.8	29.1	4	4
72	1	3	1	1	0	1	1	0	0	1	1	0.	4.	120	1	0	0	0	473.1	20.9	422	547	52.3	20.4	5	475.4	20.3	415	520	51.1	19.8	5	4
69	1	3	1	0	0	1	1	0	0	1	1	0.	4.	120	1	0	0	0	339.3	23.3	291	391	35.8	31.2	4	333.6	28.4	248	399	41.6	20.9	4	4
75	1	2	1	1	0	1	1	0	1	1	1	0.	4.	120	1	0	0	0	252.8	32	180	328	38.3	23.4	4	246.3	28.4	163	336	42.7	27.4	4	4
76	1	3	1	0	0	0	1	0	0	0	0	0.	4.	120	1	0	0	0	448.1	19.2	407	495	49.9	19.5	5	449.7	17.4	407	488	54.6	19	5	5
87	1	2	0	0	0	0	1	0	1	0	0	0.	4.	110	1	0	0	0	314	39.1	210	434	20.4	25.6	3	317.5	30.5	250	418	31.8	30.7	4	4
70	1	2	1	1	0	1	1	0	0	1	1	0.	4.	110	1	0	0	0	398.7	27.2	331	470	47.4	24	4	399.7	34.6	316	489	49.9	25.5	5	4
72	1	3	1	1	0	1	1	0	0	1	1	0.	4.	110	1	0	0	0	496.1	27.8	418	572	43.1	23.4	4	494	26.1	422	571	54	22.6	5	5
71	0	3	1	1	1	1	1	0	0	1	1	0.	4.	110	1	0	0	0	525.3	19.6	472	580	36.3	41.3	5	531.4	23.7	461	593	55.3	21.3	5	5
70	1	4	1	0	0	0	1	0	0	0	0	0.	4.	110	1	0	0	0	516.4	30	449	590	48.3	18.4	4	517.7	25.9	457	596	49.9	18.4	5	5
68	1	3										0.	4.	110	1	0	0	0	238.7	28.1	172	311	40.7	25.3	4	229.4	34.3	147	318	47.8	23.6	4	4
																				-	Data not analzyed due to missing CT datasets at baseline
